# Supplementary material for: A Pilot Interaction Analysis of Gut Microbiota and Peripheral Markers of Aging in Severe Psychiatric Disorders: A Role for Lachnoclostridium?
Source: MDPI journal article supplement (doi:10.3390/ijms242417618), 2023-12-18
Supplement: s1 [file s1]

**Table S1.** Comparison of dietary habits in the three samples (MDD, SCZ and HC)

| Variable    | Level                                                       | MDD<br>(N=31) | SCZ<br>(N=35) | HC<br>(N=15) | p-value |
|-------------|-------------------------------------------------------------|---------------|---------------|--------------|---------|
| Diet - N(%) | Mediterranean only                                          | 19 (61.3)     | 22 (62.9)     | 14 (93.3)    | 0.9     |
|             | Carbohydrates only                                          | 1 (3.2)       | 1 (2.9)       | 0 (0.0)      |         |
|             | Vegetarian only                                             | 2 (6.5)       | 0 (0.0)       | 0 (0.0)      |         |
|             | Mediterranean + high protein                                | 3 (9.7)       | 3 (8.6)       | 0 (0.0)      |         |
|             | Mediterranean + high protein + hypercaloric                 | 1 (3.2)       | 0 (0.0)       | 0 (0.0)      |         |
|             | Mediterranean + carbohydrates                               | 1 (3.2)       | 2 (5.7)       | 1 (6.7)      |         |
|             | Mediterranean + high protein + carbohydrates                | 1 (3.2)       | 2 (5.7)       | 0 (0.0)      |         |
|             | Mediterranean + high protein + carbohydrates + hypercaloric | 0 (0.0)       | 0 (0.0)       | 0 (0.0)      |         |
|             | Mediterranean + hypercaloric + carbohydrates                | 1 (3.2)       | 1 (2.9)       | 0 (0.0)      |         |
|             | Mediterranean + hypercaloric                                | 0 (0.0)       | 0 (0.0)       | 0 (0.0)      |         |
|             | High protein + carbohydrates                                | 1 (3.2)       | 0 (0.0)       | 0 (0.0)      |         |
|             | High protein + hypercaloric                                 | 0 (0.0)       | 0 (0.0)       | 0 (0.0)      |         |
|             | Hypercaloric + carbohydrates                                | 0 (0.0)       | 3 (8.6)       | 0 (0.0)      |         |
|             | Hypercaloric + carbohydrates + vegetarian                   | 1 (3.2)       | 0 (0.0)       | 0 (0.0)      |         |
|             | Vegan only                                                  | 0 (0.0)       | 1 (2.9)       | 0 (0.0)      |         |

Abbreviations: HC = Healthy Controls; MDD = Major Depressive Disorder; N = number; NA = Not Available; SCZ = Schizophrenia.
